# Supplementary material for: Disruption of quercetin metabolism by fungicide affects energy production in honey bees (Apis mellifera)
Source: HighWire-hosted journal article supplement (doi:10.1073/pnas.1614864114), 2017-02-13
Supplement: pnas.201614864SI.pdf [file pnas.201614864SI.pdf]

**Table S1. Differentially expressed nuclear-encoded mitochondrial genes in honey bees consuming bee candy with and without 0.25 mM quercetin (identified from the genes in clusters 2–4 of DAVID functional annotation clustering analysis of the 1,612 DEGs between control and 0.25 mM quercetin treatment)**

| Group/category | logFC   | logCPM   | P value  | False discovery rate | Gene name |                                                               |
|----------------|---------|----------|----------|----------------------|-----------|---------------------------------------------------------------|
| I              | GB40810 | -0.69909 | 5.402091 | 0.000115             | 0.001503  | Mitochondrial transmembrane protein 70 (TMM70)                |
| II             | GB46026 | -0.61376 | 7.521537 | 7.76E-06             | 0.000213  | Translocase of outer membrane 70 (TOM70)                      |
|                | GB41686 | -0.83581 | 5.086601 | 1.24E-05             | 0.000304  | Translocase of outer membrane 7 (TOM7)                        |
|                | GB52009 | -0.46277 | 4.993231 | 0.001215             | 0.007815  | Mitochondrial import inner membrane translocase subunit Tim22 |
|                | GB51224 | -0.89028 | 5.725054 | 7.53E-07             | 3.72E-05  | Mitochondrial import inner membrane translocase subunit Tim8  |
|                | GB41303 | -1.55119 | 4.453304 | 6.86E-08             | 5.60E-06  | Mitochondrial import inner membrane translocase subunit Tim13 |
|                | GB48338 | -0.8348  | 4.716947 | 1.15E-06             | 5.19E-05  | Mitochondrial import inner membrane translocase subunit Tim9  |
|                | GB41210 | -0.92735 | 3.023617 | 1.41E-05             | 0.000329  | Mitochondrial import inner membrane translocase subunit Tim9B |
|                | GB45523 | -0.46461 | 6.193456 | 0.000237             | 0.002509  | Mitochondrial import inner membrane translocase subunit Tim10 |
|                | GB51425 | -0.5886  | 5.156958 | 0.000215             | 0.002337  | S-adenosylmethionine mitochondrial carrier protein            |
| III            | GB51124 | -0.7261  | 5.72987  | 1.26E-06             | 5.66E-05  | Mitochondrial DNA-directed RNA polymerase                     |
|                | GB44671 | -0.60222 | 3.600628 | 0.000483             | 0.004189  | Mitochondrial transcription factor B2                         |
|                | GB48641 | -0.57184 | 7.087967 | 0.000261             | 0.002698  | Mitochondrial ribosomal protein L9                            |
|                | GB41068 | -0.47664 | 5.810876 | 0.000448             | 0.003979  | Mitochondrial ribosomal protein L12                           |
|                | GB45419 | -0.42757 | 5.241461 | 0.001351             | 0.008482  | Mitochondrial ribosomal protein L15                           |
|                | GB54344 | -0.50983 | 5.53275  | 0.000473             | 0.004153  | Mitochondrial ribosomal protein L20                           |
|                | GB56016 | -0.55226 | 6.323073 | 0.000456             | 0.004036  | Mitochondrial ribosomal protein L30                           |
|                | GB46453 | -1.24915 | 1.399884 | 4.26E-05             | 0.000734  | Mitochondrial ribosomal protein L33                           |
|                | GB42615 | -0.66194 | 4.763463 | 9.05E-05             | 0.001275  | Mitochondrial ribosomal protein L36                           |
|                | GB45886 | -1.39102 | 0.728716 | 0.001157             | 0.007562  | Mitochondrial ribosomal protein L38                           |
|                | GB40535 | -1.14895 | 0.855782 | 8.71E-05             | 0.001251  | Mitochondrial ribosomal protein L48                           |
|                | GB44877 | -0.903   | 6.025927 | 1.79E-05             | 0.0004    | Mitochondrial ribosomal protein L49                           |
|                | GB50746 | -2.12237 | 1.533952 | 5.90E-08             | 4.90E-06  | Mitochondrial ribosomal protein L52                           |
|                | GB48201 | -0.74085 | 5.835489 | 0.000245             | 0.002577  | Mitochondrial ribosomal protein L53                           |
|                | GB46748 | -0.74646 | 6.098186 | 0.000163             | 0.0019    | Mitochondrial ribosomal protein L54                           |
|                | GB54312 | -1.31916 | 4.571064 | 1.10E-05             | 0.000276  | Mitochondrial ribosomal protein L55                           |
|                | GB53663 | -0.95587 | 5.444343 | 1.16E-05             | 0.000288  | Mitochondrial GTPase Era                                      |
|                | GB50804 | -0.68672 | 5.019691 | 0.00079              | 0.005849  | Mitochondrial ribosomal protein S9                            |
|                | GB51537 | -0.47101 | 5.079988 | 0.000683             | 0.005287  | Mitochondrial ribosomal protein S11                           |
|                | GB41359 | -0.85848 | 5.771637 | 0.000336             | 0.003233  | Mitochondrial ribosomal protein S14                           |
|                | GB48064 | -0.82279 | 6.018325 | 4.10E-05             | 0.000711  | Mitochondrial ribosomal protein S15                           |
|                | GB43537 | -0.66769 | 5.525932 | 0.000471             | 0.004137  | Mitochondrial ribosomal protein S16                           |
|                | GB54652 | -0.61878 | 6.022327 | 0.000569             | 0.004696  | Mitochondrial ribosomal protein S18C                          |

## Other Supporting Information Files

[Dataset S1 \(XLS\)](#)

[Dataset S2 \(XLS\)](#)

[Dataset S3 \(XLS\)](#)

[Dataset S4 \(XLSX\)](#)
